# Supplementary material for: A new AMPK isoform mediates glucose-restriction induced longevity non-cell autonomously by promoting membrane fluidity
Source: PubMed Central journal article supplement (PMC9849402; doi:10.1038/s41467-023-35952-z), 2023-01-18
Supplement: 41467_2023_35952_MOESM1_ESM.pdf [file 41467_2023_35952_MOESM1_ESM.pdf]

## SUPPLEMENTARY INFORMATION

**A new AMPK isoform mediates glucose-restriction induced longevity non-cell autonomously by promoting membrane fluidity**

Jin-Hyuck Jeong<sup>1,2,7</sup>, Jun-Seok Han<sup>1,7</sup>, Youngae Jung<sup>3,7</sup>, Seung-Min Lee<sup>1</sup>, So-Hyun Park<sup>1,2</sup>, Mooncheol Park<sup>1</sup>, Min-Gi Shin<sup>1</sup>, Nami Kim<sup>3</sup>, Mi Sun Kang<sup>3</sup>, Seokho Kim<sup>4</sup>, Kwang-Pyo Lee<sup>1,2</sup>, Ki-Sun Kwon<sup>1,5</sup>, Chun-A Kim<sup>1</sup>, Yong Ryoul Yang<sup>1</sup>, Geum-Sook Hwang<sup>3,6\*</sup> and Eun-Soo Kwon<sup>1</sup>

\*

<sup>1</sup>Aging Research Center, Korea Research Institute of Bioscience and Biotechnology (KRIBB), Daejeon, 34141, Korea,

<sup>2</sup>Biomolecular Science, KRIBB School of Bioscience, Korea University of Science and Technology (UST), Daejeon, 34141, Korea,

<sup>3</sup>Integrated Metabolomics Research Group, Western Seoul Center, Korea Basic Science Institute, Seoul, 03759, Korea,

<sup>4</sup>Department of Medicinal Biotechnology, College of Health Sciences, Dong-A University, Busan, 49315, Korea,

<sup>5</sup>Functional Genomics, KRIBB School of Bioscience, Korea University of Science and Technology (UST), Daejeon, 34141, Korea,

<sup>6</sup>Department of Chemistry & Nano Science, Ewha Womans University, Seoul, 03760, Korea,

<sup>7</sup>These authors contributed equally to this work.

\*Correspondence : [gshwang@kbsi.re.kr](mailto:gshwang@kbsi.re.kr), [eunsoo.kwon@kribb.re.kr](mailto:eunsoo.kwon@kribb.re.kr).

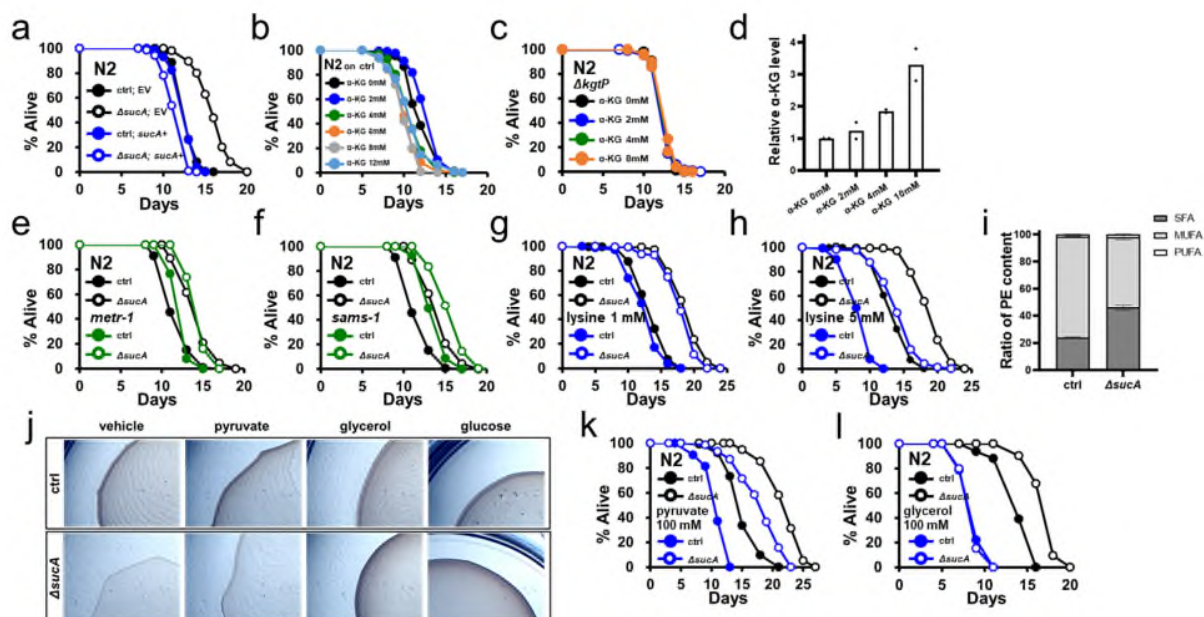

### Supplementary Figure 1. GR-modulated lifespans under various conditions

**a**, Lifespan showing that wild-type *sucA*<sup>+</sup> complementation suppress the lifespan extension by  $\Delta$ sucA mutation ( $P = 0.147$ , P value determined by two-tailed Student's *t* test). Results from representative experiments are shown with additional repeats.

**b**, Lifespans showing that  $\alpha$ KG supplementations (2, 4, 6, 8, 12mM) do not extend the *C. elegans* lifespan. Results from one of three independent experiments are shown.

**c**, Lifespan showing that  $\alpha$ KG supplementations (2, 4, 8mM) do not extend the *C. elegans* lifespan fed  $\Delta$ kgtP *E. coli* ( $P = 0.727$ , P value determined by two-tailed Student's *t* test). Results from representative experiments are shown with additional repeats.

**d**, Assay of intracellular  $\alpha$ KG measurement showed that increase in a dose-dependent manner. 2 biological repeats are used for analysis. bars indicate mean of relative  $\alpha$ KG level.

**e-f**, Lifespan showing that GR diets extend the lifespan of *metr-1(ok521)* (e) and *sams-1(ok3033)*

mutants (f) ( $P < 1.0 \times 10^{-10}$ , P value determined by two-tailed Student's *t* test). Results from representative experiments are shown with additional repeats.

**g-h**, Lifespan showing that lysine treatment (1mM, 5mM) does not extend lifespan of *C. elegans*. ( $P < 1.0 \times 10^{-10}$ , P value determined by two-tailed Student's *t* test). Results from representative experiments are shown with additional repeats.

**i**, Relative saturation of acyl chains of phosphatidylethanolamine (PE) obtained from control,  $\Delta$ *sucA E. coli* showed  $\Delta$ *sucA E. coli* is increased saturated fatty acid (SFA) significantly. All results are presented as means  $\pm$  SEM (independent biological repeats N=3).

**j**, DIC image showing differential growth of  $\Delta$ *sucA E. coli* by pyruvate, glycerol and glucose. Representative photos from additional repeats are shown.

**k**, Lifespan showing that pyruvate treatment (100mM) does not affect lifespan extension by GR diets. ( $P < 1.0 \times 10^{-10}$ , P value determined by two-tailed Student's *t* test). Results from representative experiments are shown with additional repeats.

**l**, Lifespan showing that glycerol treatment (100mM) completely suppressed GR-mediated lifespan extension. ( $P = 0.3822$ , P value determined by two-tailed Student's *t* test). Results from representative experiments are shown with additional repeats.

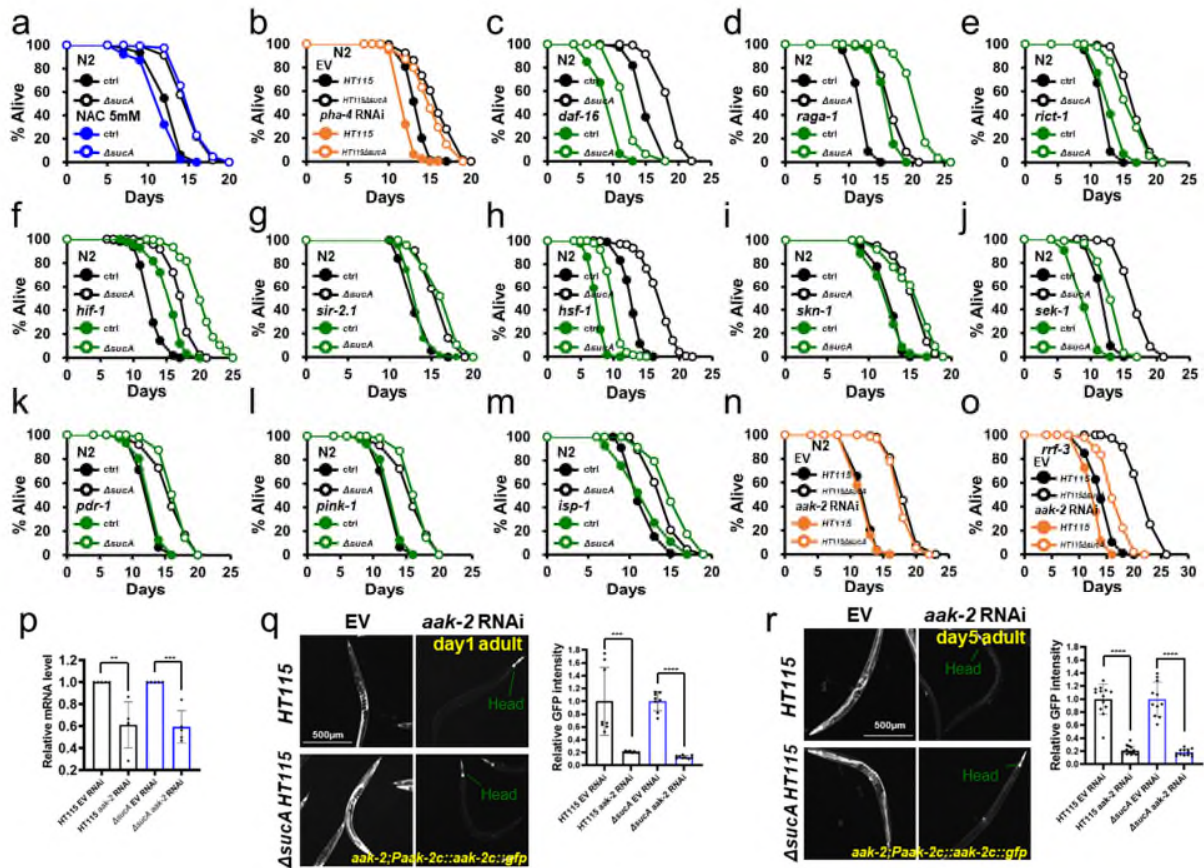

## Supplementary Figure 2. GR-modulated lifespans of *C. elegans* mutants, transgenic animals, or RNAi animals

**a**, Lifespan showing that *N*-acetyl cysteine (NAC) does not affect lifespan extension by GR diets ( $P < 1.0 \times 10^{-10}$ , P value determined by two-tailed Student's *t* test). Results from representative experiments are shown with additional repeats.

**b-g**, Lifespans showing that DR effectors are not required for GR-induced longevity ( $P < 1.0 \times 10^{-10}$ , P value determined by two-tailed Student's *t* test). Results from one of at least two independent experiments are shown. The lifespan of *C. elegans* mutants presented are *pha-4*

RNAi (b), *daf-16(mgDf50)* (c), *raga-1(ok386)* (d), *riict-1(ft7)* (e), *hif-1(ia4)* (f), and *sir-2.1(ok434)* (g).

**h-m**, Lifespan showing that stress response and mitochondrial longevity pathway are not required for GR-induced longevity ( $P < 0.001$ , P value determined by two-tailed Student's *t* test).

Results from one of at least two independent experiments are shown. The lifespan of *C. elegans* mutants presented are *hsf-1(sy441)* (h), *skn-1(zu135)* (i), *sek-1(km4)* (j), *pdr-1(gk448)* (k), *pink-1(ok3538)* (l), and *isp-1(qm150)* (m).

**n**, Lifespan showing that *aak-2* RNAi does not reduce the lifespan extension by GR diets in wild type N2 ( $P < 1.0 \times 10^{-10}$ , P value determined by two-tailed Student's *t* test). Results from representative experiments are shown with additional repeats.

**o**, Lifespan showing that *aak-2* RNAi significantly attenuates the lifespan extension by GR diets in RNAi hypersensitive *rrf-3(pk1426)* animals. Results from representative experiments are shown with additional repeats.

**p**, Relative *aak-2* transcript levels showing that *aak-2* RNAi significantly reduces the expression of *aak-2* (mean  $\pm$  s.d. of five biological replicates,  $P = 0.0032$ ,  $P = 0.0003$ , respectively, P value determined by two-tailed Student's *t* test). Total RNAs are obtained from day3 N2 animals grown on control and *aak-2* RNAi bacteria.

**q-r**, GFP images showing that *aak-2* RNAi significantly reduces the fluorescence intensity of *aak-2(ok524);aak-2c::gfp* transgenic animals. Results from representative experiments are shown with additional repeats. Right panels are quantifications. GFP intensity are quantified using ImageJ (Error bar indicate mean  $\pm$  s.d.,  $n \geq 8$  for each condition,  $P < 0.001$ , EV RNAi vs.

*aak-2* RNAi  $P = 0.0009$  (q), P value determined by two-tailed Student's  $t$  test).

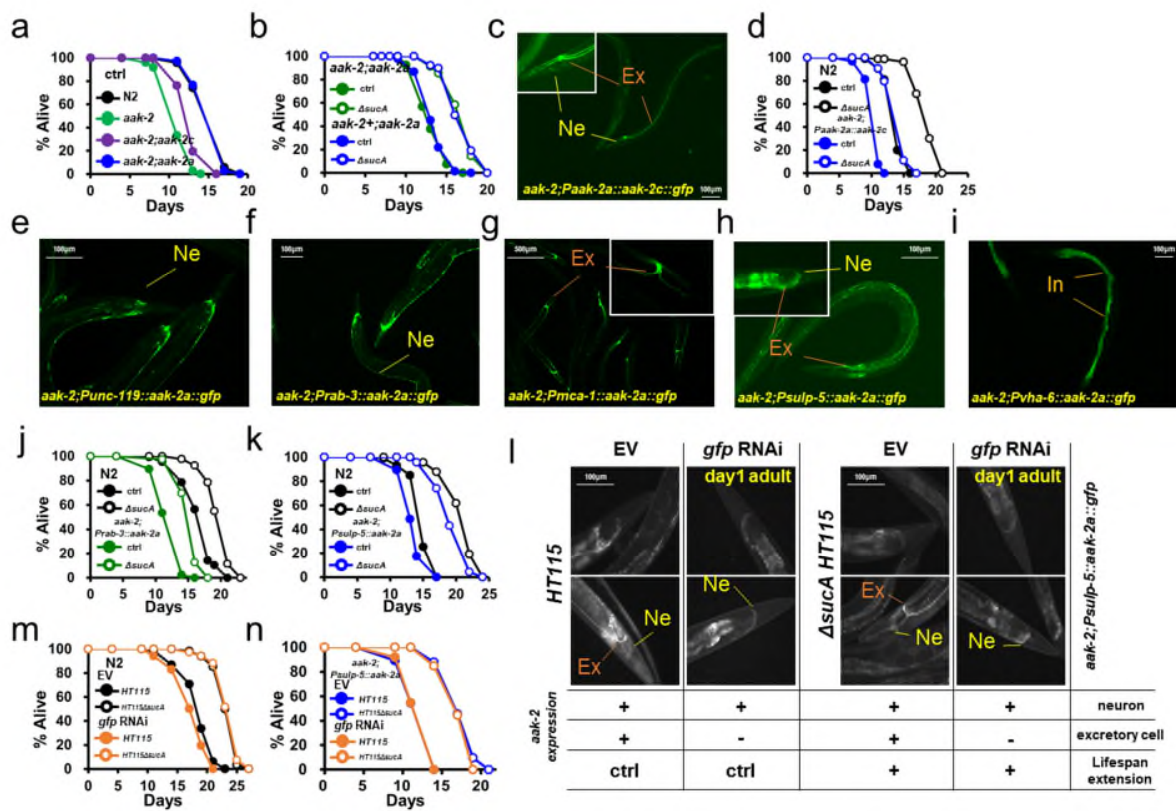

### Supplementary Figure 3. Neuronal AMPK is required for GR-induced longevity

**a**, Lifespans showing the differential contributions to lifespan by AAK-2a and AAK-2c isoform.

AAK-2a play the critical role in lifespan regulation. *aak-2(ok524);aak-2c* transgenic animals

lived longer than *aak-2* mutant animals ( $P < 1.0 * 10^{-10}$ , P value determined by two-tailed

Student's *t* test). Results from representative experiments are shown with additional repeats.

**b**, Lifespan showing that lifespan of *aak-2(ok524);aak-2a::gfp* animals are comparable with

those of *aak-2<sup>+</sup>;aak-2a::gfp* animals on either AL or GR diets. Results from representative

experiments are shown with additional repeats.

**c**, GFP image showing the expression patterns of AAK-2c isoform driven by *aak-2a* promoter.

AAK-2c::GFP is expressed in head neurons (Ne) and excretory cells (Ex), similarly with AAK-2a. Representative images obtained from 5 biological independent repeats.

**d**, Lifespan showing that GR diets extended the lifespan of *aak-2(ok524);Paak-2a::aak-2c::gfp* animals ( $P < 1.0 \times 10^{-10}$ , P value determined by two-tailed Student's *t* test). Results from representative experiments are shown with additional repeats.

**e-i**, GFP image showing the expression patterns of AAK-2a isoform. AAK-2a is expressed using tissue specific promoters, the pan-neuronal *Punc-119* (e), the pan-neuronal *Prab-3* (f), excretory *Pmca-1* (g), excretory *Psulp-5* (h), and intestinal *Pvha-6* (i) promoters in the *aak-2(ok524)* background. The *Psulp-5* driven *aak-2a::gfp* is in the excretory cells and neurons (h). Representative images obtained from at least 3 biological independent repeats.

**j**, Lifespan showing that GR diets extended the lifespan of *aak-2(ok524);Prab-3::aak-2a::gfp* ( $P < 1.0 \times 10^{-10}$ , P value determined by two-tailed Student's *t* test). Results from representative experiments are shown with additional repeats.

**k**, Lifespan showing that GR diets extended the lifespan of *aak-2(ok524);Psulp-5::aak-2a::gfp* ( $P < 1.0 \times 10^{-10}$ , P value determined by two-tailed Student's *t* test). Results from one of three independent experiments are shown.

**l**, GFP images showing that *gfp* RNAi specifically reduces the expression of *aak-2a* in excretory cells in day 1 adult *aak-2(ok524);Psulp-5::aak-2a::gfp* animals. Representative images obtained from 2 biological independent repeats.

**m-n**, Lifespans showing that GR diets extended the lifespan of wild type *C. elegans* (m) and *aak-*



*2(ok524);Psulp-5::aak-2a::gfp* (n) when knocked down using *gfp* RNAi ( $P < 1.0 \times 10^{-10}$ , P value determined by two-tailed Student's *t* test). Results from representative experiments are shown with additional repeats.

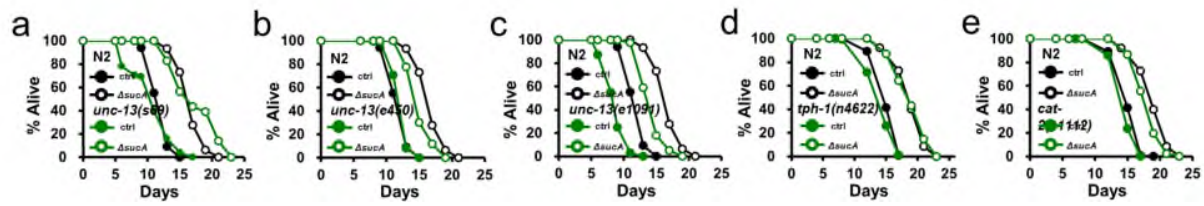

**Supplementary Figure 4. Neurotransmitters are dispensable for GR-mediated longevity**

**a-c**, Lifespans showing that multiple *unc-13* mutant alleles, including *unc-13(s69)* (a), *unc-13(e450)* (b), and *unc-13(e1091)* (c) are not implicated in GR-induced longevity ( $P < 1.0 \times 10^{-10}$ , P value determined by two-tailed Student's *t* test). Results from representative experiments are shown with additional repeats.

**d-e**, Lifespans showing that GR diets prolong the longevity of mutants for serotonin, *tph-1(n4622)* (d), dopamine, *cat-2(e1112)* (e) ( $P < 1.0 \times 10^{-10}$ , P value determined by two-tailed Student's *t* test). Results from representative experiments are shown with additional repeats.

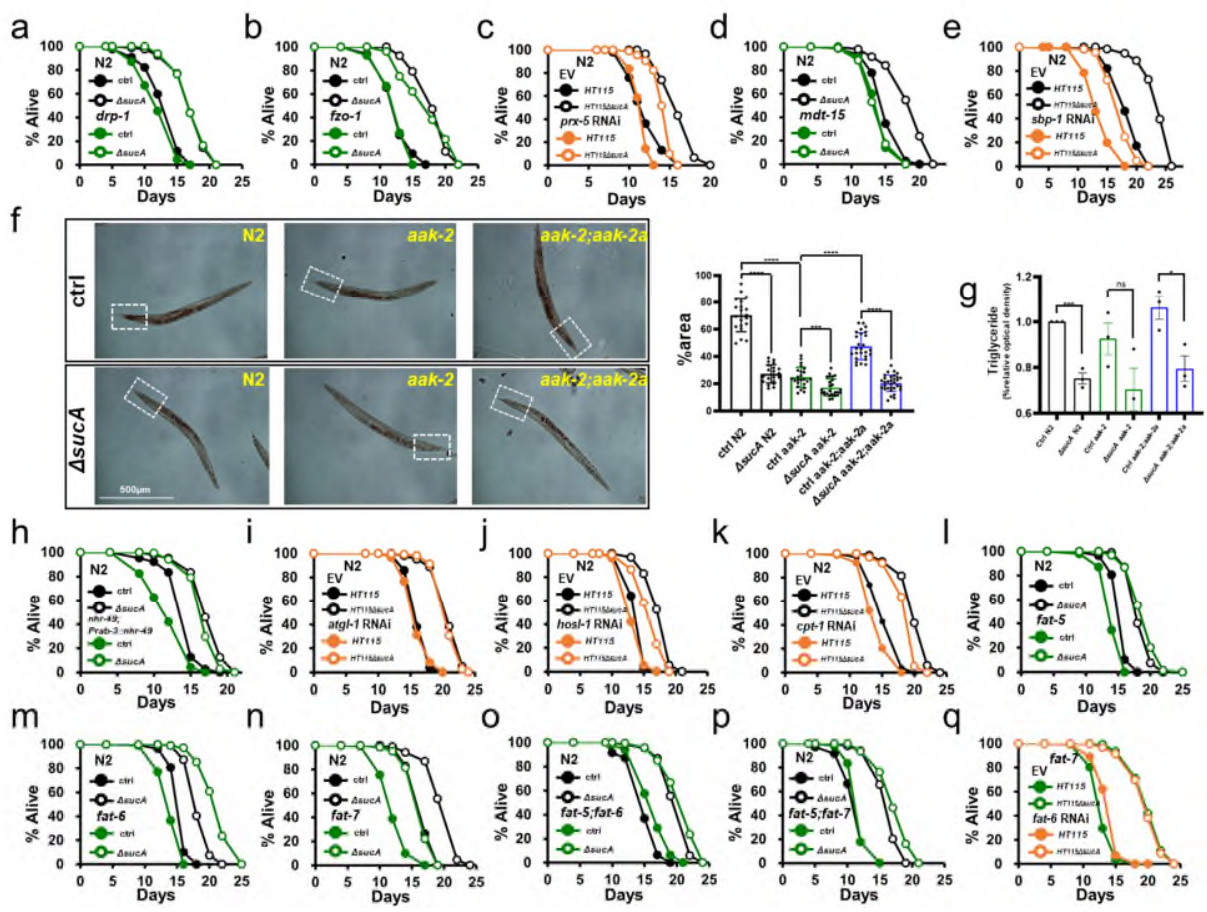

**Supplementary Figure 5. GR-induced lifespans in mutants of organelle maintenance and fat metabolism**

**a-c**, Lifespans showing that GR diets extend the lifespan of mitochondrial dynamics mutants, such as *drp-1(tm1108)* (a), *fzo-1(tm1133)* (b), and peroxisome depleted animals (*prx-5* RNAi) (c) ( $P < 1.0 \times 10^{-10}$ , P value determined by two-tailed Student's *t* test). Results from one of at least two independent experiments are shown.

**d**, Lifespan showing that *mdt-15(tm2182)* abolished GR-mediated longevity ( $P = 0.7534$ , P value determined by two-tailed Student's *t* test). Results from representative experiments are shown

with additional repeats.

**e**, Lifespan showing that *sbp-1* RNAi does not affect GR-mediated longevity

**f**, Fat store of day 1 animals feeding AL vs. GR diets. Fixed worms are stained with Oil Red O dye. Fat contents are quantified using the ImageJ software. Intensity of posterior parts of intestine are quantified as fat contents (dotted boxes) using ImageJ software (\*\* $P < 0.001$ , \*\*\* $P < 0.0001$ , *aak-2* on AL vs. GR diets  $P = 0.0003$ , two-tailed unpaired Student's *t* test).

Error bars indicate standard error of mean (SEM). Results from representative experiments are shown with additional repeats,  $n \geq 20$  for each condition. Right panel is quantification.

**g**, Biochemical assays for triacylglycerol (TAG) levels in wild type N2, *aak-2(ok524)*, and *aak-2(ok524);aak-2a::gfp* animals grown on AL vs. GR diets. 3 biological repeats are used for analysis,  $n > 500$  for each condition. Error bars indicate standard error of mean (SEM).

**h**, Lifespans showing that *nhr-49(nr2041)* with pan-neuronal promoter *rab-3::NHR-49::GFP* rescued GR-mediated longevity. Results from representative experiments are shown with additional repeats.

**i-k**, Lifespans showing that GR diets extended the lifespan of *C. elegans* when *atgl-1* (i), *hosl-1* (j), and *cpt-1* (k) was knocked down using RNAi ( $P < 1.0 * 10^{-10}$ , P value determined by two-tailed Student's *t* test). Results from representative experiments are shown with additional repeats.

**l-q**, Lifespans showing that GR diets extended the lifespan of *fat-5(tm420)* (l), *fat-6(tm331)* (m), *fat-7(wa36)* (n) single mutants ( $P < 1.0 * 10^{-10}$ , P value determined by two-tailed Student's *t* test).

The lifespan of each single mutant is tested once, as GR diets extend the lifespan of all double mutants combinations. GR diets extend the lifespan of *fat-5(tm420);fat-6(tm331)* (o), *fat-5(tm420);fat-7(wa36)* (p), *fat-7(wa36);fat-6(RNAi)* (q) animals ( $P < 1.0 * 10^{-10}$ , P value determined by two-tailed Student's *t* test). Results from representative experiments are shown with additional repeats.

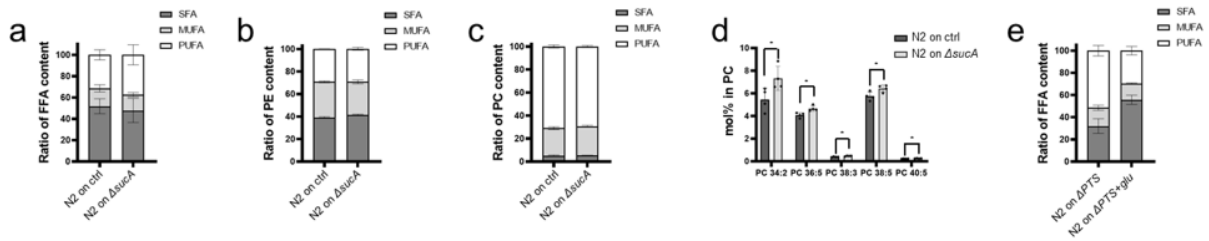

## Supplementary Figure 6. GR diets modulate lipid composition

**a**, Relative saturation of free fatty acid (FFA) of *C. elegans* fed on AL vs. GR diets. All results are presented as means  $\pm$  SEM (independent biological repeats N=4). Two-tailed Student's *t* test was used. See also Supplementary table 7.

**b**, Relative saturation of acyl chains of phosphatidylethanolamine (PE) obtained from *C. elegans* fed on AL vs. GR diets. All results are presented as means  $\pm$  SEM (independent biological repeats N=4). Two-tailed Student's *t* test was used. See also Supplementary table 7.

**c**, Relative saturation of acyl chains of phosphatidylcholine lipids (PC) obtained from *C. elegans* fed on AL vs. GR diets. All results are presented as means  $\pm$  SEM (independent biological repeats N=4). Two-tailed Student's *t* test was used. See also Supplementary table 7.

**d**, *C. elegans* phosphatidylcholine lipids (PC) composition changes fed on AL vs. GR diets. Each row indicates the fraction (mol%) of fatty acids in PC (\**P* < 0.05, PC 32:1 *P* = 0.01178, PC 34:2 0.04259, PC 36:5 *P* = 0.02995, PC 38:5 *P* = 0.02995, PC 38:6 *P* = 0.00895, PC 38:9 *P* = 0.0173, PC 40:5 *P* = 0.040, *P* value determined by two-tailed Student's *t* test). All results are presented as means  $\pm$  SEM (independent biological repeats N=4). Two-tailed unpaired Student's *t* test was used. See also Supplementary table 7.

**e**, Relative saturation of acyl chains of *C. elegans* free fatty acid (FFA) changes fed on  $\Delta PTS^{Glc}$  vs.  $\Delta PTS^{Glc}$  *E. coli* +2% glucose (SFA, PUFA,  $P < 0.001$ ). All results are presented as means  $\pm$  SEM (independent biological repeats N=3). Two-tailed Student's *t*-test was used. See also Supplementary table 7.
