# Supplementary material for: A new AMPK isoform mediates glucose-restriction induced longevity non-cell autonomously by promoting membrane fluidity
Source: PubMed Central journal article supplement (PMC9849402; doi:10.1038/s41467-023-35952-z), 2023-01-18
Supplement: 41467_2023_35952_MOESM3_ESM.pdf [file 41467_2023_35952_MOESM3_ESM.pdf]

**Title: Supplementary Movie. 1**

**Description:** Fluorescence Recovery after Photobleaching measurements of worms expressing *glo-1p::GFP::ras-2* CAAX on AL diets (Related to Fig. 7a).

Fluorescence intensity was measured for 90 s every 2 s. The movie was filmed with 5.00 fps frame rate using a Zeiss LSM800 confocal microscope and Zen software (Zeiss).

**Title: Supplementary Movie. 2**

**Description:** Fluorescence Recovery after Photobleaching measurements of worms expressing *glo-1p::GFP::ras-2* CAAX on GR diets (Related to Fig. 7a).

Fluorescence intensity was measured for 90 s every 2 s. The movie was filmed with 5.00 fps frame rate using a Zeiss LSM800 confocal microscope and Zen software (Zeiss).

**Title: Supplementary Movie. 3**

**Description:** Fluorescence Recovery after Photobleaching measurements of *aak-2* mutant worms expressing *glo-1p::GFP::ras-2* CAAX on AL diets (Related to Fig. 7d).

Fluorescence intensity was measured for 90 s every 2 s. The movie was filmed with 5.00 fps frame rate using a Zeiss LSM800 confocal microscope and Zen software (Zeiss).

**Title: Supplementary Movie. 4**

**Description:** Fluorescence Recovery after Photobleaching measurements of *aak-2* mutant worms expressing *glo-1p::GFP::ras-2* CAAX on GR diets (Related to Fig. 7d).

Fluorescence intensity was measured for 90 s every 2 s. The movie was filmed with 5.00 fps frame rate using a Zeiss LSM800 confocal microscope and Zen software (Zeiss).

**Title: Supplementary Movie. 5**

**Description:** Fluorescence Recovery after Photobleaching measurements of *aak-2;aak-2a::gfp* mutant worms expressing *glo-1p::GFP::ras-2* CAAX on AL diets (Related to Fig. 7e).

Fluorescence intensity was measured for 90 s every 2 s. The movie was filmed with 5.00 fps frame rate using a Zeiss LSM800 confocal microscope and Zen software (Zeiss).

**Title: Supplementary Movie. 6**

**Description:** Fluorescence Recovery after Photobleaching measurements of *aak-2;aak-2a::gfp* mutant worms expressing *glo-1p::GFP::ras-2* CAAX on GR diets (Related to Fig. 7e).

Fluorescence intensity was measured for 90 s every 2 s. The movie was filmed with 5.00 fps frame rate using a Zeiss LSM800 confocal microscope and Zen software (Zeiss).
